# Supplementary material for: Synthesis and bioapplication of a highly selective and sensitive fluorescent probe for HOCl based on a phenothiazine–dicyanoisophorone conjugate with large Stokes shift
Source: Royal Society of Chemistry journal article supplement (doi:10.1039/c8nj00279g), 2018-01-01
Supplement: c8nj00279g1.pdf [file c8nj00279g1.pdf]

# **Synthesis and bioapplication of a highly selective and sensitive fluorescent probe for HOCl based on a phenothiazine-dicyanoisophorone conjugate with large Stokes shift**

Dasheng Zheng,<sup>a</sup> Xiaoying Qiu,<sup>a</sup> Chang Liu,<sup>a</sup> Xiaojie Jiao,<sup>a</sup> Song He,<sup>a</sup> Liancheng Zhao<sup>a,b</sup>, Xianshun  
Zeng<sup>\*a,b</sup>

<sup>a</sup> *Tianjin Key Laboratory for Photoelectric Materials and Devices, School of Materials Science & Engineering, Tianjin University of Technology, Tianjin 300384, China. Email: xshzeng@tjut.edu.cn.*

<sup>b</sup> *School of Materials Science and Engineering, Harbin Institute of Technology, Harbin 150001, China.*

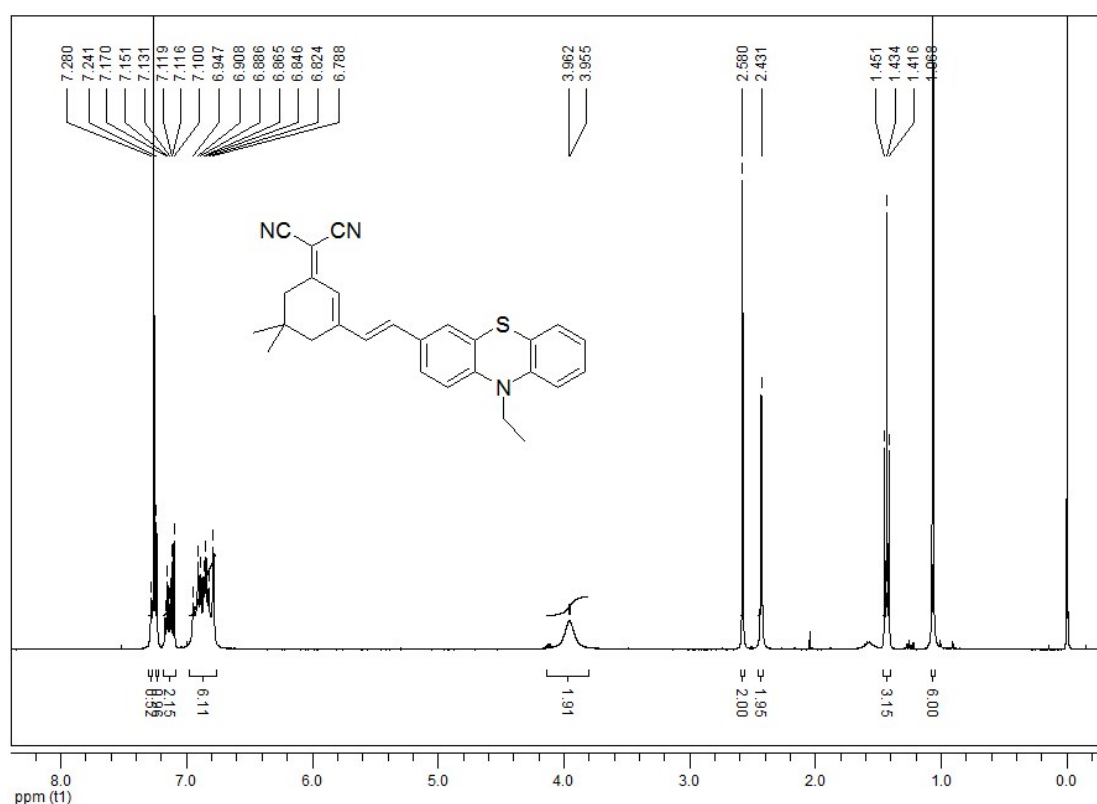

**Figure S1** <sup>1</sup>H NMR of **Dcp-EPtz** (400 MHz, CDCl<sub>3</sub>).

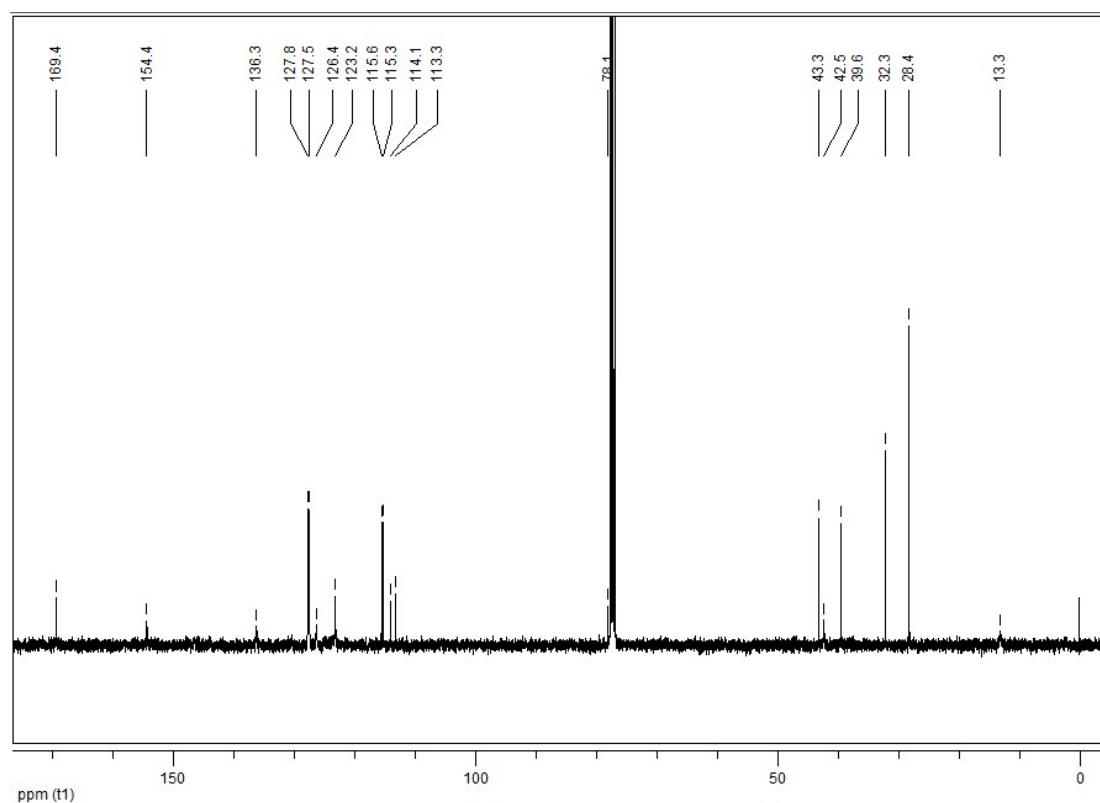

**Figure S2**  $^{13}\text{C}$  NMR of **Dcp-EPtz** (100 MHz,  $\text{CDCl}_3$ ).

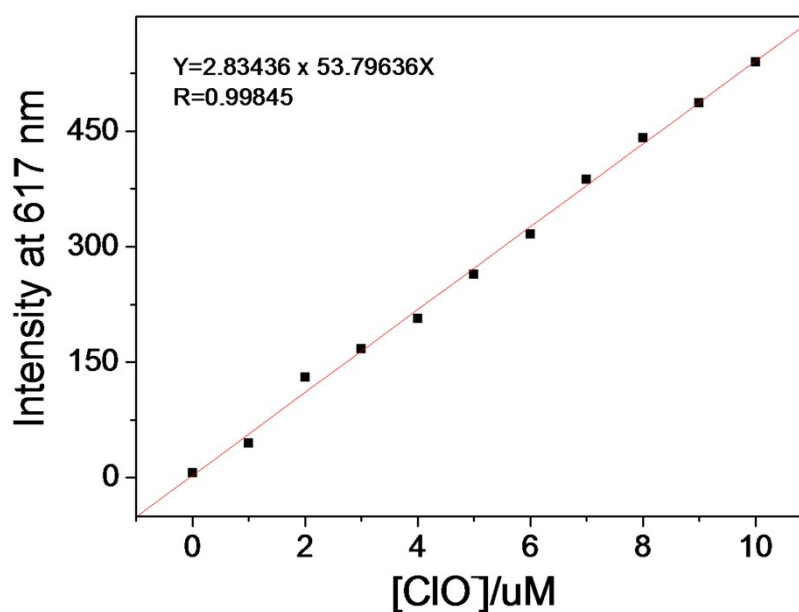

**Figure S3** Emission (at 617 nm) of **L** at different concentrations of  $\text{ClO}^-$ . A linear relationship between the fluorescence intensity and the  $\text{ClO}^-$  concentration could be obtained in the 0-10.0  $\mu\text{M}$  concentration range ( $R = 0.998$ ). The detection limit was then calculated with the equation: detection limit =  $3\sigma_{\text{bi}}/m$ , where  $\sigma_{\text{bi}}$  is the standard deviation of blank measurements ( $3\sigma_{\text{bi}} = 2.1113$ , derived from ten measurements),  $m$  is the slope between intensity versus sample concentration. The detection limit was measured to be  $3.9 \times 10^{-8} \text{ M}$ .

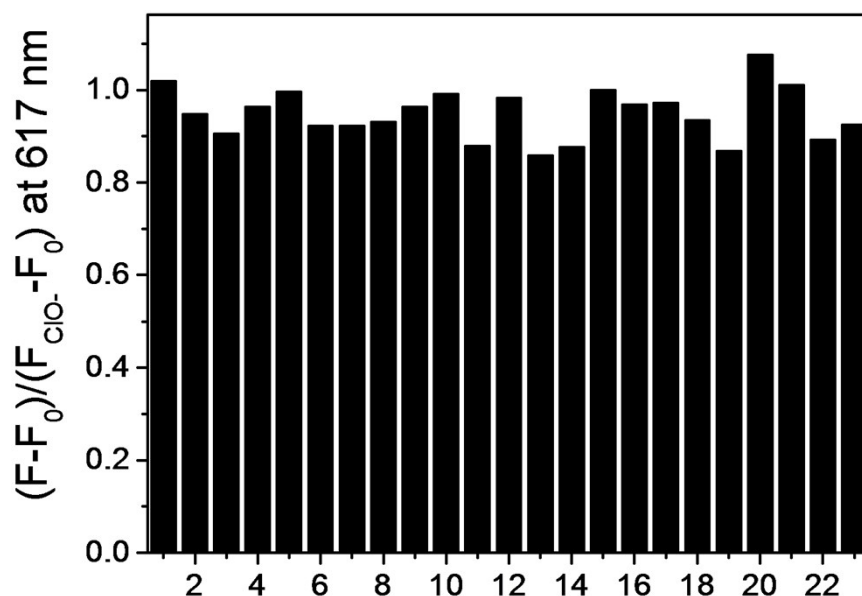

**Figure S4** Change ratio  $(F - F_0)/(F_{\text{ClO}^-} - F_0)$  of fluorescence intensity of **L** (5  $\mu\text{M}$ ) upon the addition of 10.0 equiv.  $\text{ClO}^-$  in the presence of 10.0 equiv. other anions and ROS in PBS: ethanol=1:1 (10 mM, pH = 7.4, v/v). 1:  $\text{AcO}^-$ , 2:  $\text{Br}^-$ , 3:  $\text{Cl}^-$ , 4:  $\text{ClO}^-$ , 5:  $\text{ClO}_4^-$ , 6:  $\text{CO}_3^{2-}$ , 7:  $\text{F}^-$ , 8:  $\text{H}_2\text{O}_2$ , 9:  $\text{H}_2\text{PO}_4^-$ , 10:  $\text{HCO}_3^-$ , 11:  $\text{HPO}_4^{2-}$ , 12:  $\text{HSO}_4^-$ , 13:  $\text{NO}$ , 14:  $\text{NO}_2^-$ , 15:  $\text{NO}_3^-$ , 16:  $\text{O}_2^-$ , 17:  $\cdot\text{OH}$ , 18:  $\text{ONOO}^-$ , 19:  $\text{PO}_4^{3-}$ , 20:  $\text{SO}_3^{2-}$ , 21:  $\text{SO}_4^{2-}$ , 22: TBHP, 23:  $\text{O}_2^1$ .

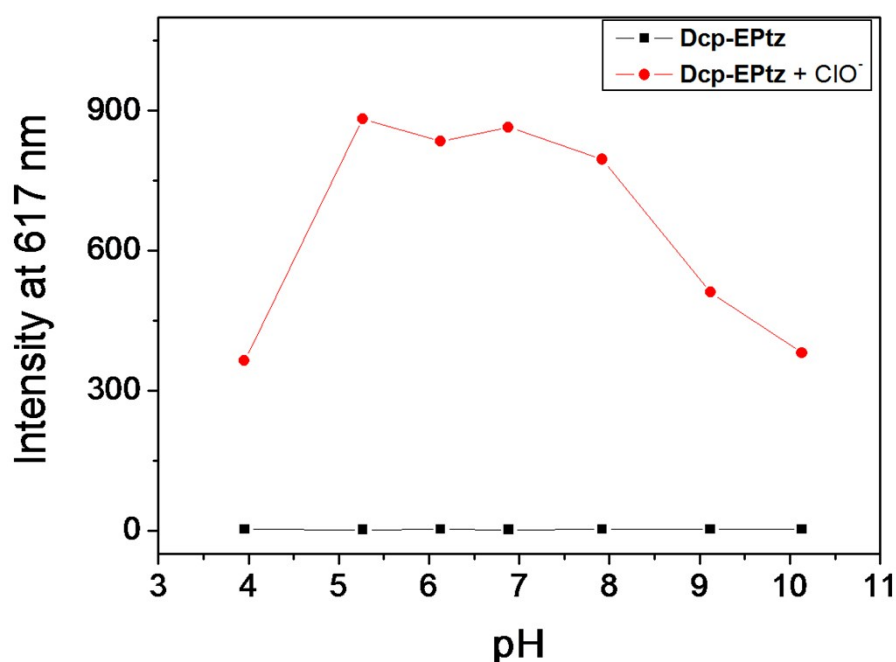

**Figure S5** Fluorescence intensity of **Dcp-EPtz** (5  $\mu\text{M}$ ) in the absence and presence of  $\text{NaClO}$  (10.0 equiv.) at various pH values (from 4.0 to 10.0) in PBS: ethanol=1:1 (10 mM, pH = 7.4, v/v) at 617 nm.  $\lambda_{\text{ex}} = 475$  nm, slit: 5 nm, 5 nm.

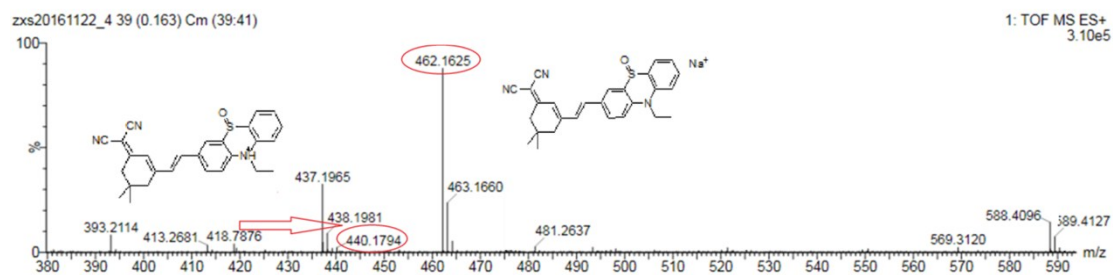

**Figure S6** HRMS spectra of **Dcp-EPtz** upon addition of  $\text{ClO}^-$  (2.0 equivalents). The peak at  $[\text{Dcp-EPtzO} + \text{Na}]^+ = 462.1625$  (calc.  $m/z$  462.1616) and a weak peak at  $[\text{Dcp-EPtzO} + \text{H}]^+ = 440.1794$  (calc.  $m/z$  440.1791) corresponded to **Dcp-EPtzO**, respectively.
